# Supplementary material for: Anti-Inflammatory Dietary Diversity and Depressive Symptoms among Older Adults: A Nationwide Cross-Sectional Analysis
Source: MDPI journal article supplement (doi:10.3390/nu14235062), 2022-11-28
Supplement: s1 [file s1]

**Supplement Table S1: Sensitivity Analyses of associations of types of Dietary Diversity, Dietary Pattern with depressive symptoms.**

|                      | Diet Diversity Index<br>(DDI) | Protein-enriched Diet<br>Diversity Index (PEDDI) | Anti-inflammatory Diet<br>Diversity Index (AIDDI) |
|----------------------|-------------------------------|--------------------------------------------------|---------------------------------------------------|
| <b>MMSE ≥ 21</b>     |                               |                                                  |                                                   |
| Model 1              | 0.88 (0.87-0.90) *            | 0.87 (0.85-0.90) *                               | 0.76 (0.74-0.79) *                                |
| Model 2              | 0.90 (0.88-0.92) *            | 0.90 (0.88-0.93) *                               | 0.78 (0.76-0.81) *                                |
| Model 3              | 0.91 (0.89-0.93) *            | 0.91 (0.88-0.94) *                               | 0.80 (0.77-0.83) *                                |
| Model 4              | 0.91 (0.89-0.92) *            | 0.91 (0.88-0.93) *                               | 0.80 (0.77-0.83) *                                |
| <b>Without ADL</b>   |                               |                                                  |                                                   |
| Model 1              | 0.88 (0.86-0.90) *            | 0.87 (0.85-0.90) *                               | 0.75 (0.73-0.78) *                                |
| Model 2              | 0.89 (0.88-0.91) *            | 0.90 (0.87-0.93) *                               | 0.77 (0.75-0.80) *                                |
| Model 3              | 0.91 (0.89-0.92) *            | 0.91 (0.88-0.94) *                               | 0.79 (0.77-0.82) *                                |
| Model 4              | 0.90 (0.88-0.92) *            | 0.90 (0.87-0.93) *                               | 0.79 (0.76-0.82) *                                |
| <b>No Imputation</b> |                               |                                                  |                                                   |
| Model 1              | 0.88 (0.87-0.90) *            | 0.88 (0.85-0.90) *                               | 0.77 (0.74-0.79) *                                |
| Model 2              | 0.90 (0.88-0.92) *            | 0.90 (0.88-0.93) *                               | 0.78 (0.76-0.81) *                                |
| Model 3              | 0.91 (0.89-0.93) *            | 0.91 (0.89-0.94) *                               | 0.80 (0.78-0.83) *                                |
| Model 4              | 0.91 (0.89-0.93) *            | 0.91 (0.88-0.94) *                               | 0.80 (0.77-0.83) *                                |

Model 1 controlling for gender, age;

Model 2 controlling for gender, age, hukou, ethnic, BMI, education;

Model 3 controlling for gender, age, hukou, ethnic, BMI, education, physical activities, smoking, drinking;

Model 4 controlling for gender, age, hukou, ethnic, BMI, education, smoking, drinking, feeding in ADL disability, physical activities, dementia, tooth count.

\* P<0.05.
